# Supplementary material
Source: Springer Nature journal article supplement (https://www.springermedizin.de/resource/supplementary/12908_2002_7_MOESM3_ESM.pdf/9525212)

■ Age less than 10 yrs □ between 10 and 18 yrs ■ older than 18 yrs

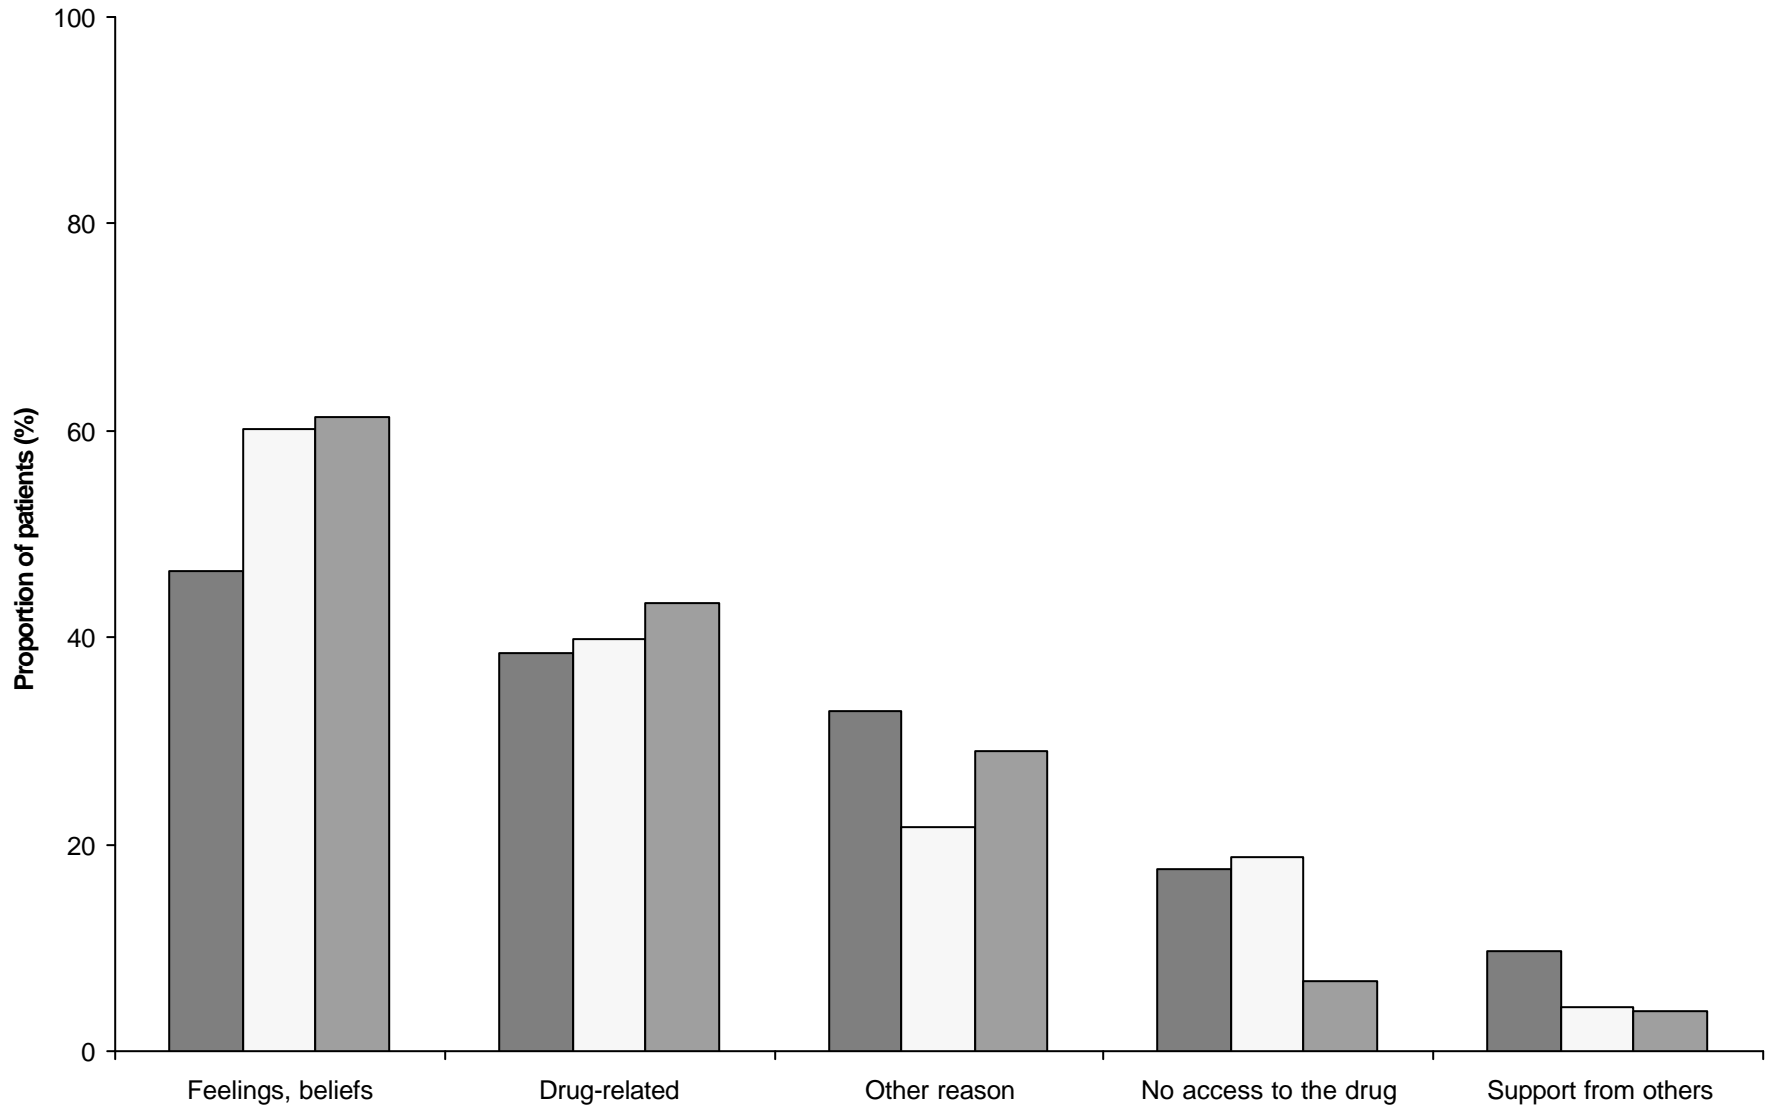

Supplement: MOESM3 [file 9525212]
